# Supplementary material
Source: PubMed Central journal article supplement (PMC6289094)
Supplement: mmc1.pdf [file mmc1.pdf]

**Biophysical Journal, Volume 115**

**Supplemental Information**

**The Second Messenger c-di-GMP Adjusts Motility and Promotes Surface Aggregation of Bacteria**

**Renjie Wang, Fangbin Wang, Rui He, Rongjing Zhang, and Junhua Yuan**

## **Supporting Material**

**Viscosity of different concentrations of Ficoll:** The viscosity coefficients of different concentrations of Ficoll solution was measured by a viscosity meter (NDJ-5s; Shanghai Pingxuan Scientific) at room temperature of 23 °C. The viscosities of Ficoll at different concentrations (15, 12, 9, 7, 5, 3, 2 and 0%) are: 9.99 cp, 6.71 cp, 4.24 cp, 3.00 cp, 2.19 cp, 1.60 cp, 1.34 cp, 0.99 cp. The values are similar to that measured by Chen and Berg (ref. 16).

Table S1. Strains and plasmids used in this work.

| <b>Strain</b> | <b>Relevant genotype</b>     | <b>Plasmids</b>                                                  | <b>Assay</b>                   |
|---------------|------------------------------|------------------------------------------------------------------|--------------------------------|
| JY27          | $\Delta fliC cheY$           | pKAF131 ( <i>fliC<sup>st</sup></i> )                             | Torque-speed                   |
| RW1           | $\Delta fliC cheY yhjH$      | pKAF131                                                          | Torque-speed                   |
| RW3           | $\Delta fliC cheY yhjH ycgR$ | pKAF131                                                          | Torque-speed                   |
| JY27          | $\Delta fliC cheY$           | pKAF131<br>pWB5 ( <i>cheY</i> )                                  | CCW vs CW rotation             |
| RW1           | $\Delta fliC cheY yhjH$      | pKAF131<br>pWB5                                                  | CCW vs CW rotation             |
| RW3           | $\Delta fliC cheY yhjH ycgR$ | pKAF131<br>pWB5                                                  | CCW vs CW rotation             |
| JY26          | $\Delta fliC$                | pKAF131                                                          | Rotational bias                |
| RW2           | $\Delta fliC yhjH$           | pKAF131                                                          | Rotational bias                |
| RW4           | $\Delta fliC yhjH ycgR$      | pKAF131                                                          | Rotational bias                |
| JY26          | $\Delta fliC$                | pBAD33 <i>fliC</i>                                               | Near surface                   |
| RW2           | $\Delta fliC yhjH$           | pBAD33 <i>fliC</i>                                               | Near surface                   |
| RW1           | $\Delta fliC cheY yhjH$      | pKAF131<br>pHS1 (Proteorhodopsin)                                | Resurrection experiment        |
| RW3           | $\Delta fliC cheY yhjH ycgR$ | <i>efgp-ycgR</i> on pTrc99a                                      | Dynamic fluorescent experiment |
| RW2           | $\Delta fliC yhjH$           | pJY7 ( <i>motA motB</i> )<br>pFD313 ( <i>fliC<sup>st</sup></i> ) | Overproduction of MotA MotB    |

## Supporting figures

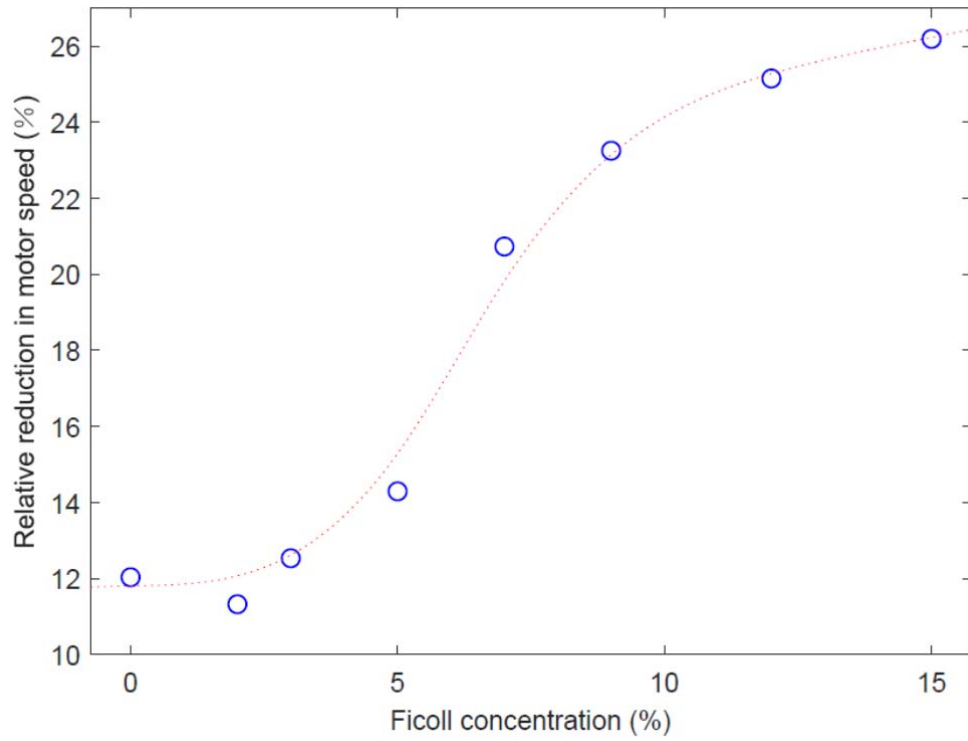

Fig.S1. Relative reduction in motor speed with elevated c-di-GMP level for motors labeled with 0.35- $\mu\text{m}$ -diameter latex beads in different concentrations of Ficoll solution. The red dashed line is a spline fitting to guide the eye.

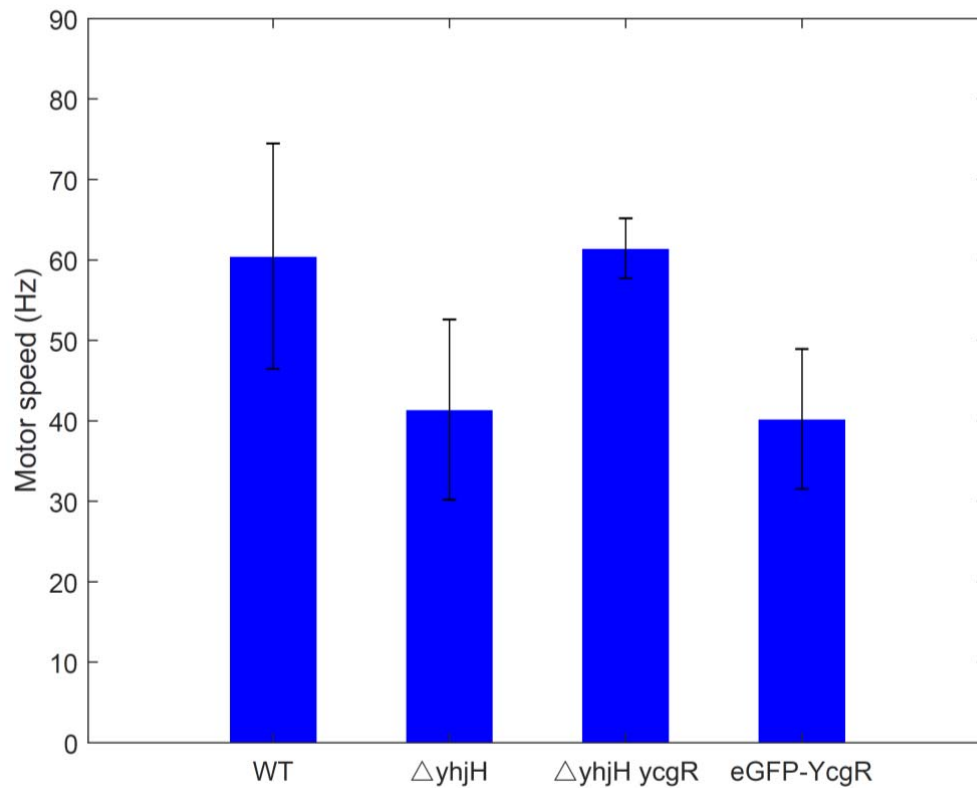

Fig.S2. Motor speed of different strains with 1.0  $\mu$ m diameter latex bead. From left to right: JY27, RW1, RW3, and RW3 transformed with pTrc99a-eGFP-YcgR. The bars and errors are means and standard deviations. (The number of motors measured were 43, 37, 39 and 41, respectively.)

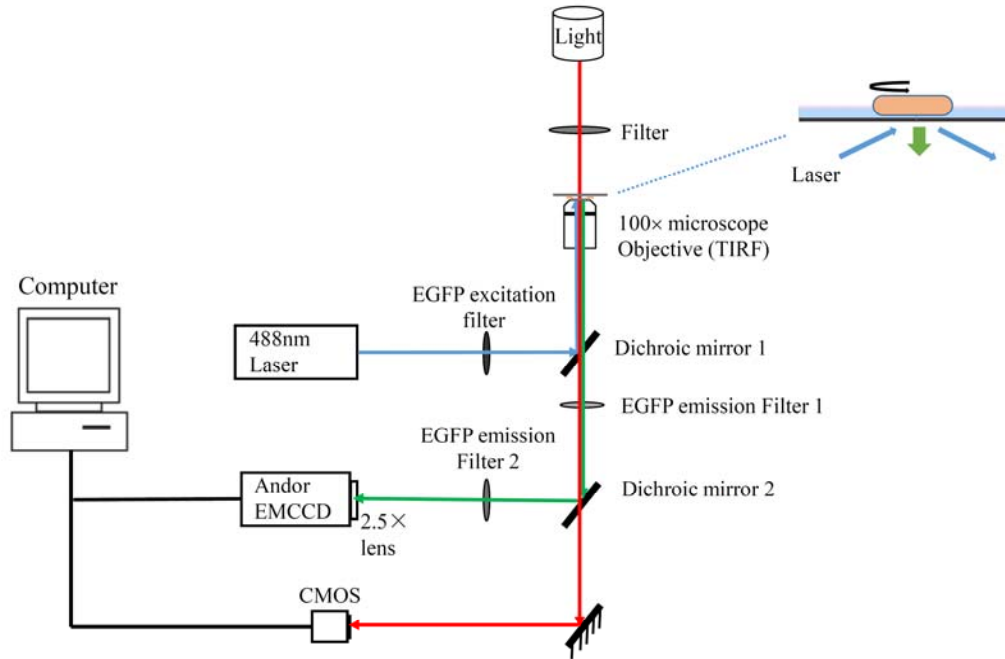

Fig.S3. Schematic diagram of the TIRF setup used for viewing eGFP-YcgR localization with TIRF and tether-cell rotation with phase-contrast simultaneously.

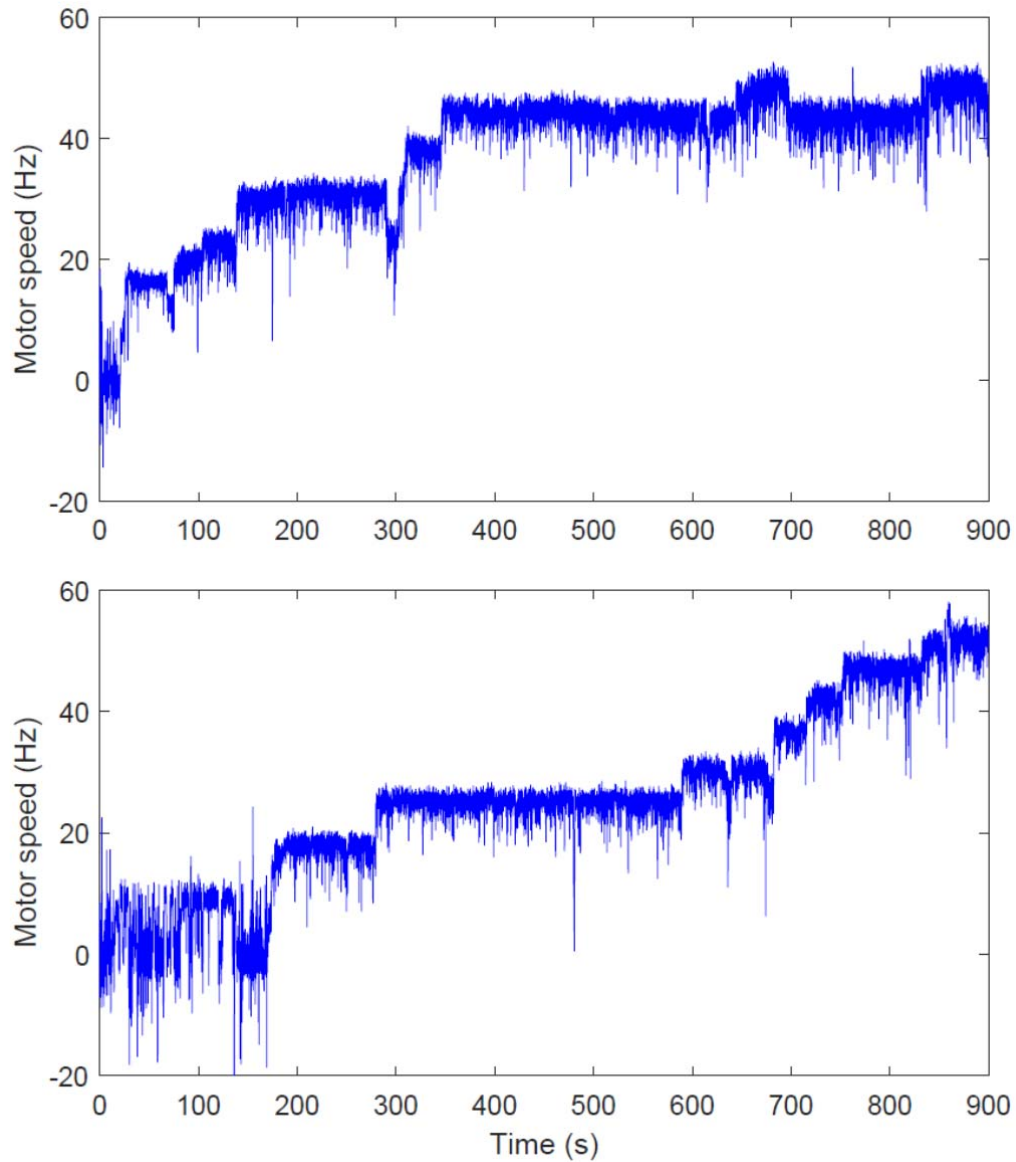

Fig. S4. Sample traces of motor resurrection at high load (1- $\mu\text{m}$ -diameter latex bead). 20 mM  $\text{NaN}_3$  was flowed for 30 min to deplete PMF, and PMF was then restored at time zero.
